# Supplementary material for: A Cost-Effectiveness Evaluation of Germline BRCA1 and BRCA2 Testing in UK Women with Ovarian Cancer
Source: PubMed Central journal article supplement (PMC5406158; doi:10.1016/j.jval.2017.01.004), 2017-04

# Cost-effectiveness plane

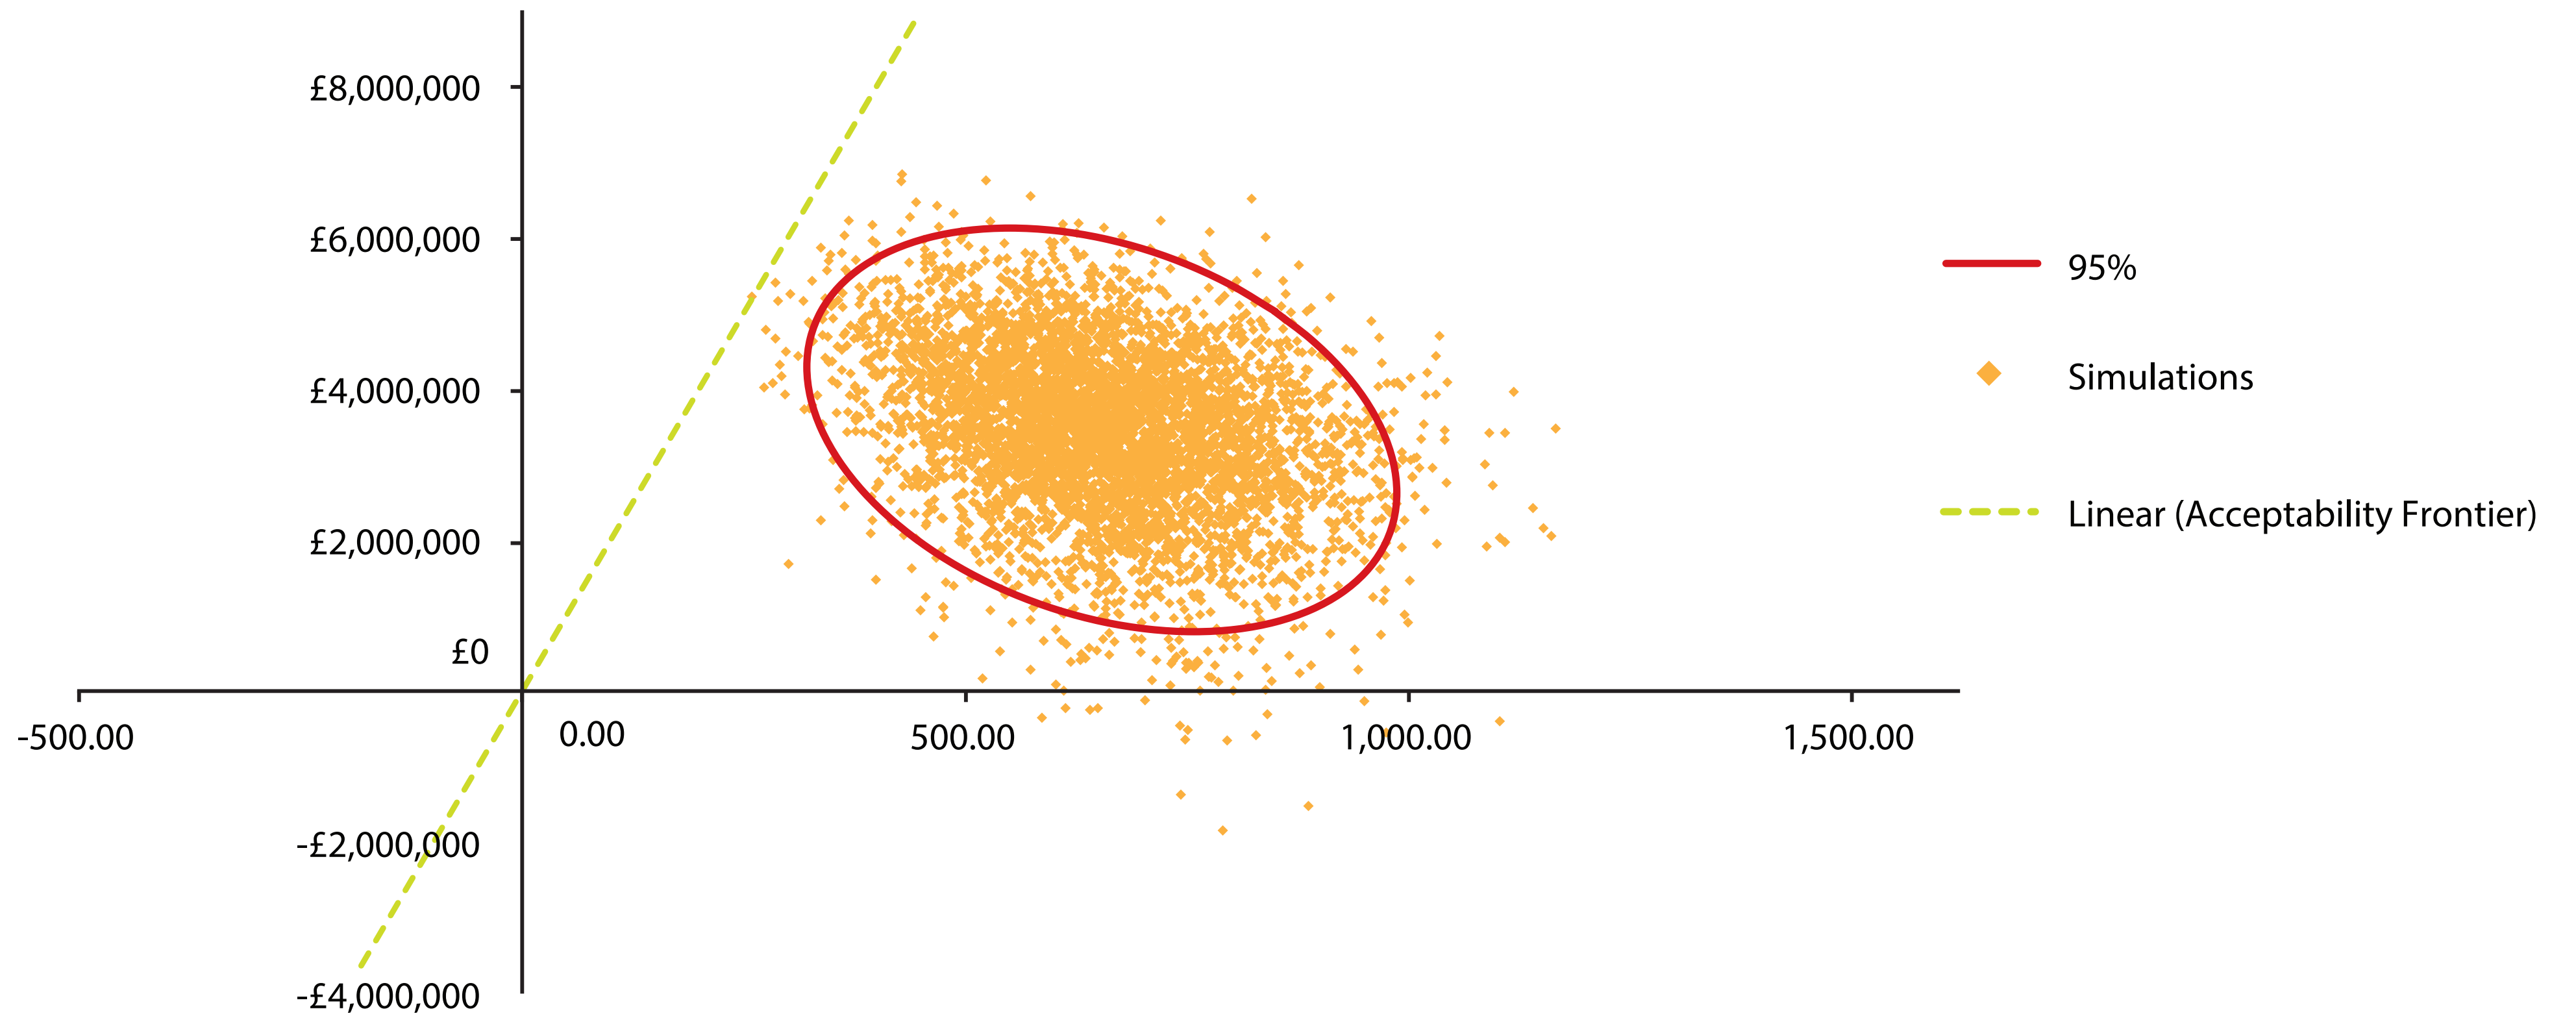

Supplement: mmc2.pdf [file mmc2.pdf]
